# Supplementary material for: Increased nonstationarity of stormflow threshold behaviors in a forested watershed due to abrupt earthquake disturbance
Source: Copernicus journal article supplement (doi:10.5194/hess-27-3005-2023), 2023-08-14
Supplement: Supplementary file 1 [file hess-27-3005-2023-supplement.pdf]

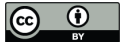

*Supplement of*

## **Increased nonstationarity of stormflow threshold behaviors in a forested watershed due to abrupt earthquake disturbance**

**Guotao Zhang et al.**

*Correspondence to:* Peng Cui ([pengcui@imde.ac.cn](mailto:pengcui@imde.ac.cn))

The copyright of individual parts of the supplement might differ from the article licence.

**Table S1:** Changes in integrated watershed generation threshold ( $TH_{g-IWA}$ ) and rising threshold ( $TH_{r-IWA}$ ) in each stage (2007-2018) before and after the earthquake in LXR experiment watershed.

| Year         | Pre-earthquake | Post-earthquake |        |        |        |        |        |        |        |        |
|--------------|----------------|-----------------|--------|--------|--------|--------|--------|--------|--------|--------|
|              | 2007           | 2008            | 2009   | 2010   | 2011   | 2013   | 2014   | 2015   | 2017   | 2018   |
| $TH_{g-IWA}$ | 111.47         | 109.34          | 110.67 | 109.97 | 110.69 | 112.06 | 112.39 | 112.55 | 111.17 | 112.20 |
| $TH_{r-IWA}$ | 259.70         | 250.72          | 252.76 | 253.20 | 252.29 | 256.48 | 256.93 | 257.93 | 257.35 | 258.33 |
